# Supplementary material for: Modulation of thalamocortical oscillations by TRIP8b, an auxiliary subunit for HCN channels
Source: PubMed Central journal article supplement (PMC5869905; doi:10.1007/s00429-017-1559-z), 2017-11-22
Supplement: 429_2017_1559_MOESM1_ESM.pdf [file 429_2017_1559_MOESM1_ESM.pdf]

**Supplemental Table.1 I<sub>h</sub> activation kinetics in TRIP8b<sup>-/-</sup> and wildtype thalamus.**

| Time constant of I <sub>h</sub> activation   | Regions     | WT           | TRIP8b <sup>-/-</sup> | Significance |
|----------------------------------------------|-------------|--------------|-----------------------|--------------|
| <b>Fast component<br/>T<sub>1</sub> (ms)</b> | <b>VB</b>   | 121.5 ± 4.5  | 179.0 ± 8.8           | p<0.01       |
|                                              | <b>PO</b>   | 185.6 ± 8.7  | 226.4 ± 18.7          | p<0.01       |
|                                              | <b>CM</b>   | 157.8 ± 8.3  | 175.6 ± 15.2          | NS           |
|                                              | <b>dLGN</b> | 160.9 ± 6.5  | 205.5 ± 17.8          | p<0.05       |
| <b>Slow component<br/>T<sub>2</sub> (ms)</b> | <b>VB</b>   | 587.6 ± 3.6  | 934.1 ± 55.4          | p<0.001      |
|                                              | <b>PO</b>   | 736.6 ± 35.1 | 1421.5 ± 215.8        | p<0.01       |
|                                              | <b>CM</b>   | 672.0 ± 47.9 | 842.9 ± 48.5          | p<0.05       |
|                                              | <b>dLGN</b> | 880.2 ± 61.8 | 1457.5 ± 237.7        | p<0.05       |

\*NS means not significant
